# Supplementary figures and images for: CLS, PLS and PCR Methods in Different Sets of Data for Simultaneous Determination of Paracetamol and Orphenadrine Citrate in Their Combined Pharmaceutical Dosage Forms
Source: Research Square preprint supplement (doi:10.21203/rs.3.rs-1222041/v1), 2022-01-27

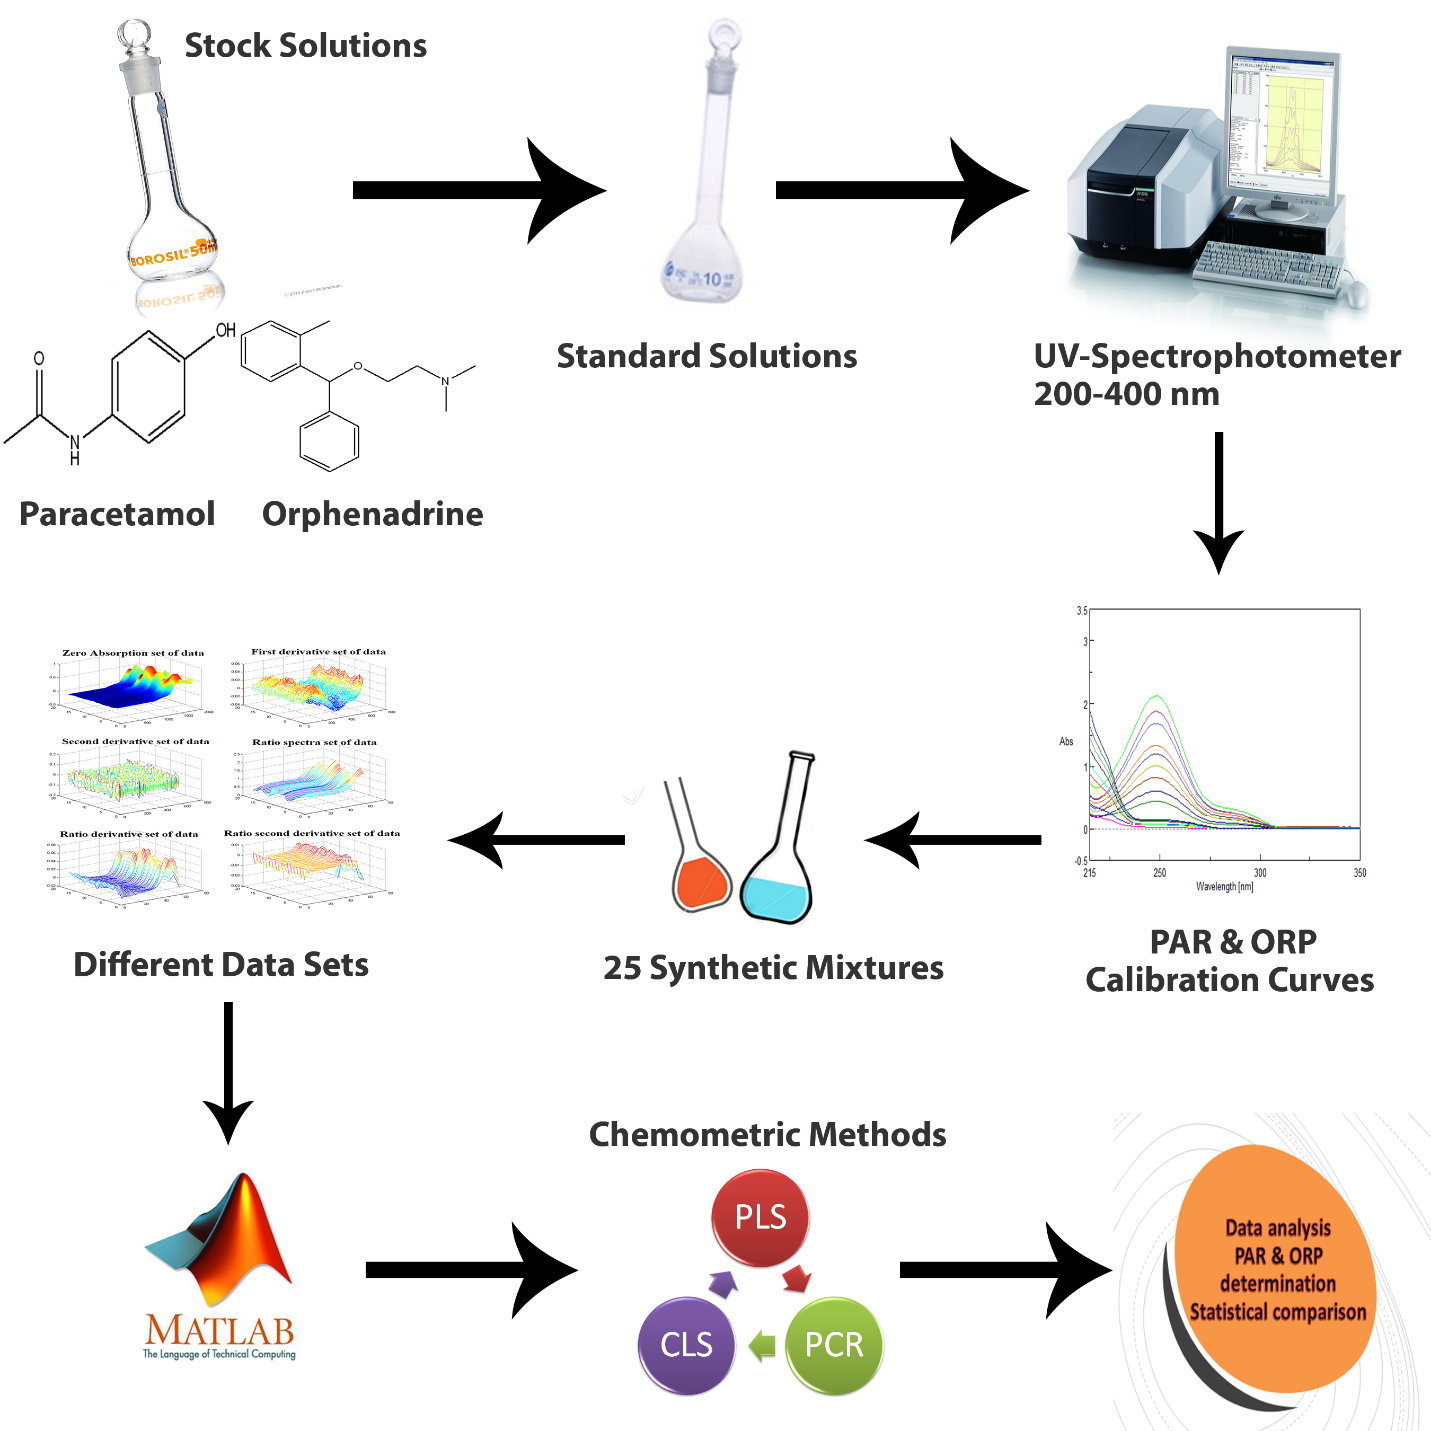

Supplement: Supplementary file 2 [file 04634157244bc48b99748eeb.docx]
